# Supplementary material
Source: publisher site journal article supplement (http://kjim.org/upload/media/kjim-2019-270-suppl2.pdf)
Supplement: Supplementary file 1 [file kjim-2019-270-suppl2.pdf]

**Supplementary Table 1. Clinical characteristics of the study subjects providing fibroblasts for culture**

| Item                       | Control                        | IPF                                   |
|----------------------------|--------------------------------|---------------------------------------|
| No.                        | 10 [4]                         | 14 [8]                                |
| Age, yr                    | 54 (46–74) [54 (48–59)]        | 61 (50–72) [64 (50–72)]               |
| Sex, male/female           | 3/7 [1/3]                      | 7/7 [4/4]                             |
| Smoke, CS/ES/NS            | 2/1/7 [0/0/4]                  | 4/4/6 [0/4/4]                         |
| Survival/death             | ND                             | 9/5 [5/3]                             |
| Follow-up duration, yr     | ND                             | 4.2 (2.9–7.0) [4.1 (2.1–7.0)]         |
| FVC, % pred.               | 98 (77–106) [98 (87–106)]      | 84 (47–104) [84 (56–99)] <sup>a</sup> |
| FEV <sub>1</sub> , % pred. | 103.3 (98–118) [112 (102–121)] | 94.9 (81.8–108) [96 (97.5–110)]       |
| DLCO, % pred.              | 88 (71–120) [90 (76–120)]      | 68 (39–90) [60 (39–87)] <sup>a</sup>  |

Values are presented as median (interquartile range). Fibroblast culture: lung fibroblasts were cultured from normal lung tissue of 10 subjects (controls) who underwent surgery to remove localized lung cancer, and from surgical biopsy specimens of 14 patients with idiopathic pulmonary fibrosis. Numbers in brackets refer to subjects whose cells were used for transcriptome chip analyses. Differences between controls and subjects with IPF were compared using Mann-Whitney *U* tests.

IPF, idiopathic pulmonary fibrosis; CS/ES/NS, current-smokers/ex-smokers/never-smokers; ND, not determined; FVC, forced vital capacity; FEV, forced expiratory value; DLCO, diffusing capacity of the lungs for carbon monoxide.

<sup>a</sup>Significances: compared to control:  $p < 0.05$ .
